# Supplementary material for: An Analysis of the Risk Factors for the Failure of Respiratory Support With High-flow Nasal Cannula Oxygen Therapy in Children with Acute Respiratory Dysfunction:a case-control study
Source: Research Square preprint supplement (doi:10.21203/rs.3.rs-126665/v1), 2020-12-15
Supplement: Supplementary file 1 [file cc7808b1133fd48608d5bbf5.docx]

**Prediction of the early failure of high-flow nasal cannula oxygen therapy based on the trend of clinical indicators**

Comparisons of the General Clinical Data

In 67 patients,55 patients were successfully treated,and 12 patients experienced failed treatment. The age of the pediatric patients in the success group ranged from 1 month to 13 years and 1 month (with a median of 5 months),and that of patients in the failed group ranged from 2 months to 8 years (with a median of 10 months).Regarding sex,in the success group,males accounted for 56.4% (31/55),while in the failed group,males accounted for 33.3% (4/12).The distributions of disease types were no significant differences between the two groups(*P*>0.05). And there also were no significant difference in age,sex or weight between the two groups too (*P* >0.05) (see Table 1).

Table 1 Comparisons between the high-flow nasal cannula oxygen therapy Success Group and Failed Group

|  | No. | Age  [*P*50（*P*25, *P*75）, month] | Male/Female (patients) | Weight  [*P*50（*P*25, *P*75）, kg] |
| --- | --- | --- | --- | --- |
| Success group | 55 | 5（2,24） | 31/24 | 7.00（5.00,10.60） |
| Failed group | 12 | 10（7,72） | 4/8 | 9.90（6.32,22.25） |
| *U(x2)* value |  | -1.916 | （2.094） | -1.693 |
| *P* value |  | 0.056 | 0.148 | 0.090 |
